# Supplementary material for: Highly efficient CRISPR/Cas9-mediated knock-in in zebrafish by homology-independent DNA repair
Source: HighWire-hosted journal article supplement (doi:10.1101/gr.161638.113), 2013-10-31
Supplement: Supplemental_Legends.docx [file Supplemental_Legends.docx]

**Supplementary Figure 1: A group of *Tg(neurod:eGFP)* transgenic embryos after CRISPR/Cas9-mediated eGFP to KalTA4 conversion. A)** Five 3dpf *Tg(neurod:eGFP) X Tg(UAS:RFP, cry1:eGFP)* transgenic fish showing conversion of eGFP to KalTA4 and consecutive RFP expression. **B)** Uninjected control embryos showing only eGFP and no RFP expression. Note that the amount of eGFP expression is clearly reduced upon sgRNA *eGFP* 1/Cas9 injection compared to non-injected embryos.

**Supplementary Figure 2: CRISPR/Cas9-mediated eGFP to KalTA4 conversion in the *Tg(neurod:eGFP)* transgenic line using sgRNA *eGFP* 2. A)** A 2dpf old *Tg(neurod:eGFP) X Tg(UAS:RFP, cry1:eGFP)* transgenic fish after successful knock-in using Cas9 and sgRNA *eGFP* 2. In the RFP panel, RFP-positive cells can be detected in the olfactory pits (asterisks). Axonal projections are visible extending into the olfactory bulb confirming the identity of the labeled neurons. The yellow color in the merged picture is due to the 3D volume reconstruction: it was not observed in single confocal stacks and does not represent a co-expression of the two fluorescent proteins. Scale bar: 50 μm. **B)** By PCR, the integration events were verified for the embryo shown in A). The fragment combination corresponds to the schematic depicted in Figure 1A. **C)** Sequence analysis of the 5’ junction between the endogenous locus and forward integrated plasmid. One fifth of the sequences shows a perfect repair without indel mutations (Δ0). At the 3’ junction between the DNA cassette and the endogenous locus, deletions and insertions could be detected. In orange, the sgRNA binding site; in blue, the PAM sequence NGG; in red, integrated additional base pairs.

**Supplementary Figure 3: Comparison of circular and linearized donor plasmid injection. A)** Representative confocal stack of a 2dpf old *Tg(neurod:eGFP) X Tg(UAS:RFP, cry1:eGFP)* embryo (dorsal view) injected with sgRNA *eGFP* 1, Cas9 mRNA and a linearized *eGFP*bait-E2A-KalTA4 donor vector. The arrow points at a single cell converted from eGFP to KalTA4 expression. **B)** Representative confocal stack of a 2dpf old *Tg(neurod:eGFP) X Tg(UAS:RFP, cry1:eGFP)* embryo (dorsal view) injected with sgRNA *eGFP* 1, Cas9 mRNA and the circular *eGFP*bait-E2A-KalTA4 donor vector. Linearization is mediated by sgRNA guided Cas9 nuclease activity. Multiple red cells are detected in various parts of the neurod expression domain**. C)** Comparison of the survival rate of embryos injected with linearized and circular plasmid. While the amount of malformed embryos is comparable, injection of the linearized plasmid is more toxic. **D)** In both cases the sgRNA/Cas9 leads to a reduction of eGFP expression intensity. **E)** While with the circular plasmid about 76% of embryos show RFP expression (with 20% showing widespread expression), in only about 10% of *Tg(neurod:eGFP) X Tg(UAS:RFP, cry1:eGFP)* embryos single RFP-positive cells can be detected after linearized plasmid injection.

**Supplementary Figure 4: Detection of *eGFP* to *KalTA4* conversion in the lens of *cry1:eGFP* transgenic embryos**. As a transgenesis marker for the UAS:RFP sequence we inserted a cassette driving *eGFP* under the control of the lens specific *cry1* promoter (*UAS:RFP, cry1:eGFP*) in the same vector. Therefore in some of the *Tg(neurod:eGFP) X Tg(UAS:RFP, cry1:eGFP)* injected embryos (8/388) we could also observe the eGFP to KalTA4 switch in the lens likely following targeted integration into the *cry1:eGFP* transgene. Right: eGFP expression in a 4dpf *Tg(neurod:eGFP) X Tg(UAS:RFP, cry1:eGFP)* embryo. Middle: RFP expression. Left: merge. Scale bar: 30 μm.

**Supplementary Figure 5: CRISPR/Cas9-mediated GFP to KalTA4 conversion in the *Tg(pou4f3:mGFP)* transgenic line.** *Tg(pou4f3:mGFP)* shows GFP expression in a subpopulation of retinal ganglion cells and the hair cells of the inner ear as well as in neuromasts of the lateral line. **A)** Transversal cryosection of a retina of a 5dpf embryo showing of a successful integration event in the *Tg(pou4f3:mGFP) X Tg(UAS:RFP, cry1:eGFP)* line after injection of the *GFP*bait-E2A-KalTA4 construct with sgRNA *GFP* 1 and Cas9 mRNA. Few retinal ganglion cells showing RFP expression can be detected. Blue staining: DAPI. Scale bar: 10 μm. **B)** GFP to KalTA4 conversion in two out of eight hair cells in a neuromast in the same experimental condition. Scale bar: 10 μm. **C)** By PCR, the targeted integration events could be verified for the fish shown in B). The fragment combination corresponds to the schematic shown in Figure 1A. As the sequence of the GFP differed from *eGFP*, alternative primers (Supplementary Table 5) were used. The fragment sizes for these primers in combination with the *pou4f3* promoter specific primer are indicated. **D)** Sequence analysis of the 5’ junction and the 3’ junction. In orange, the sgRNA binding site; in blue, the PAM sequence NGG; in red, integrated additional base pairs.

**Supplementary Figure 6: TALEN-mediated knock-in of an *UAS:eGFP-pA* cassette into the *kif5aa* locus A)** A schematic of the *kif5aa* targeting vector consisting of an *kif5aa* bait fragment harboring left and right binding sites for a TALEN pair and an *UAS:eGFP* cassette. Single embryo PCR was used to detect forward (fragment C+B) and reverse (fragment A+C) integration events of the donor plasmid. Note that integration events could be detected in 88.5% of eGFP positive embryos while PCR failed in 11.5% of cases. **B)** Representative pictures of the double transgenic line *Tg(UAS:mcherry) X Et(1.5hsp70l:Gal4-VP16)s1013t* injected with donor plasmid alone or TALEN mRNAs with a control donor plasmid bearing a scrambled bait sequence (*scrbl-UAS:eGFP*) or TALEN mRNAs with the donor plasmid bearing *Kif5aa* bait sequence. Scale bar: 1mm. **C)** Confirmation of integration events by PCR. Note that the faint band in the control samples for fragment C+B was sequenced as fragment of a ribosomal RNA gene. **D)** Sequence analysis at the 5’ and 3’ junctions of five representative targeted integration events. Grey = right TALEN binding site, blue = left TALEN binding site.

**Supplementary Figure 7: Sequence at the *neurod:eGFP* locus after**

**insertion of the *eGFP*bait-E2A-KalTA4 donor plasmid with perfect repair.** Detailed sequence at the *neurod:eGFP* locus after insertion of the *eGFPbait-E2A-KalTA4* donor plasmid after cleavage by sgRNA *eGFP* 1 guided Cas9 activity. Color coding as indicated. HindIII restriction sites used for Southern blot analysis (Figure 5 and Supplementary Figure 8) are also indicated.

**Supplementary Figure 8: PCR and Southern blot analysis of concatemer integration.** **A)** Primer combinations used to identify 5’ and 3’ junction sites of forward integrated donor plasmid and potential head-to-head, tail-to-tail or head-to-tail arrays corresponding to multiple copy integrations. **B)** Example of a single copy integration event in founder C and head-to-tail concatemer integration of donor plasmid in founder H. No PCR amplicons were detected in wildtype DNA. PCR primer combinations are listed in A). PCR products were verified by sequence analysis. **C)** Schematic representation illustrating the KalTA4 specific probe (probe 2) for Southern blot analysis to confirm KalTA4 integration at the *neurod* locus and to examine if single or multiple copy integration had taken place. **D)** In founder C only a single band at 6.6kb (black arrow) could be detected corresponding to single copy integration and consistent with the PCR analysis. In founder H instead, an additional, more intense band at 5.7kb (the size of the inserted plasmid, white arrow) could be seen consistent with the presence of concatemer of the donor plasmid as detected also by PCR analysis.

**Supplementary Figure 9: Analysis of off-target indel mutations by T7 endonuclease cleavage.** Eleven potential off-target loci (compare Supplementary Table 3) and the *neurod:eGFP* locus were successfully PCR amplified and analysed by T7 endonuclease digestion. In the top panel, PCR amplicon without T7 endonuclease digestion, lower panel after digestion. Off#7 shows cleavage in both control and injected embryos (arrows) and sequence analysis demonstrated that a polymorphism in the genetic background was present. *Neurod:eGFP* was successfully targeted by sgRNA *eGFP* 1/Cas 9 – note that two different primer pairs were used resulting in two different combinations of T7 fragments (237+230 and 237+138, arrowheads). For eight loci tested, no T7 mediated digestion could be detected, which, given the sensitivity of the T7 assay, indicates that less than 2% of indel mutations, if any, had been induced. In contrast, off#1 and off#8 show appearance of specific fragments in injected embryos after T7 digestion, indicating that significant levels of indel mutations are induced at sites off#1 and off#8 (asterisks).

**Supplementary Figure 10: PCR analysis of potential integration of the *eGFPbait-E2A-KalTA4* donor at off-target sites.** Using locus and donor vector specific primers, no integration of the donor vector at the off#1 and off#8 sites could be detected. At the *neurod:eGFP* locus, in the pool of injected embryos (#2) and in the stable *Tg(neurod:eGFPbait-E2A-KalTA4)* founder H (#3), integration events were confirmed (asterisks).
